# Supplementary material for: Effect of N-donor auxiliary ligands on the engineering of crystalline architectures of a series of lead(ii) complexes with 5-amino-2,4,6-triiodoisophthalic acid
Source: Royal Society of Chemistry journal article supplement (doi:10.1039/b914623g), 2009-12-04
Supplement: b914623g.pdf [file b914623g.pdf]

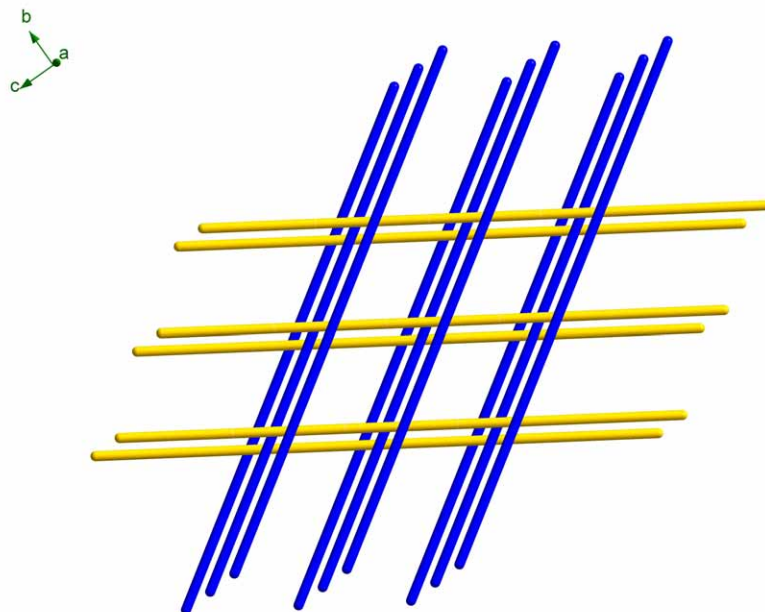

E

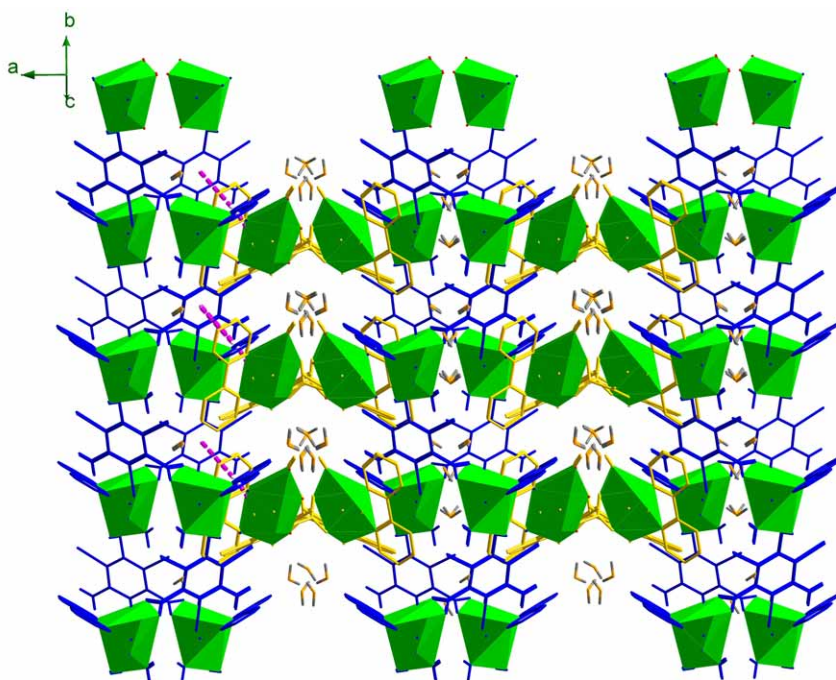

F

**Figure S1 E:** Schematic representation of 3D supramolecular MOF along [100], where the solid lines represent the  $2_1$  helices of the helical chains.

**F:** 3D supramolecular MOF with 1D channels running along [0-11-27].

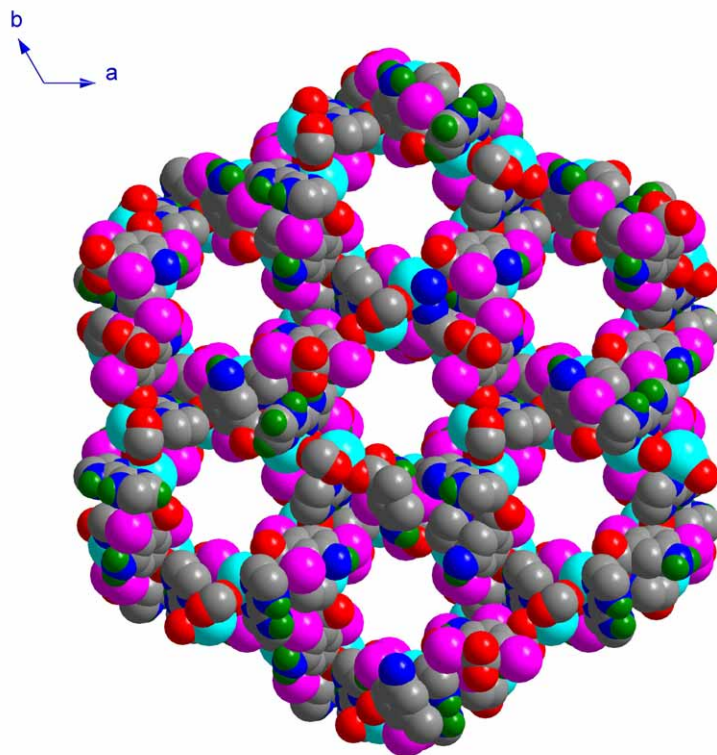

**D**

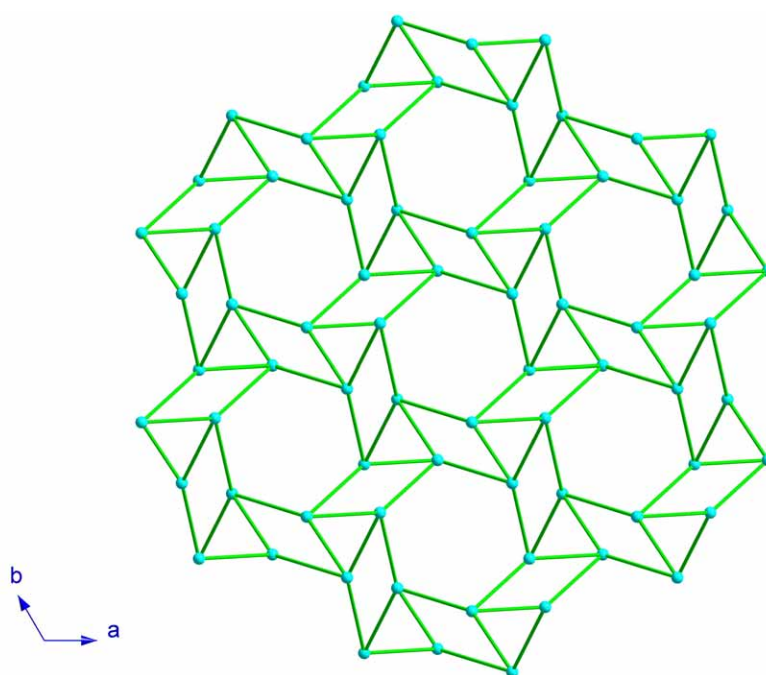

**E**

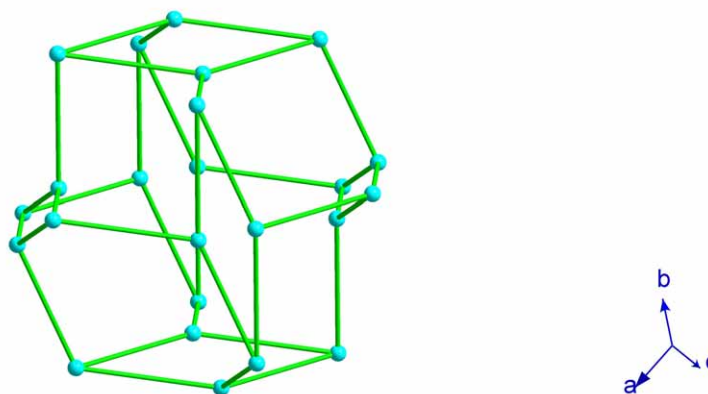

**F**

**Figure S2 D** Space-filling diagram of the framework showing the large cavities, the guest water molecules were omitted for clarity.

**E** Schematic representation of sodalite-like zeolite framework found in **2**.

**F** The sodalite-like  $\beta$ -cage ( $4^6, 6^8$ ).

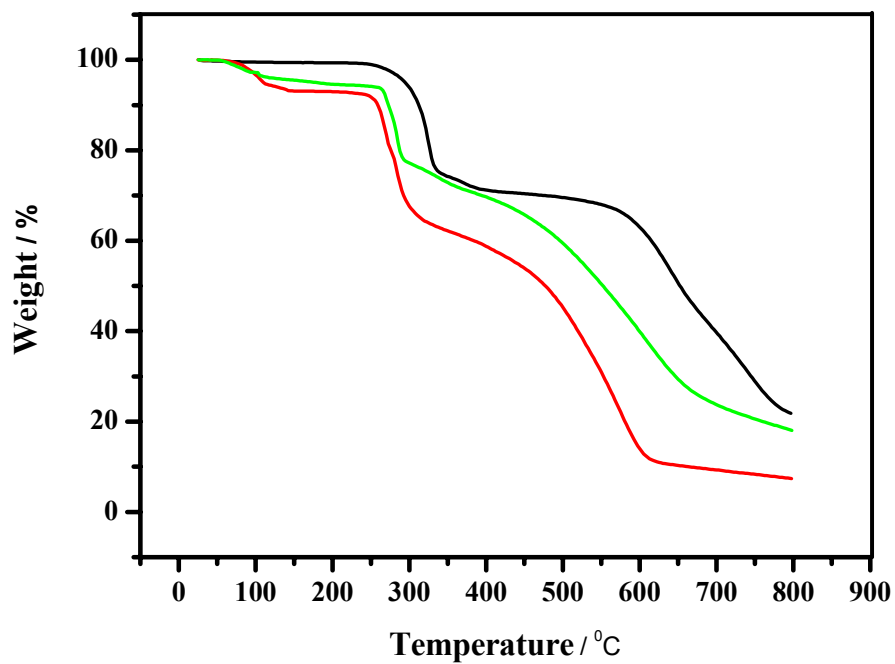

**Figure S3** TG curves of **1** (red), **2** (green), and **3** (black).

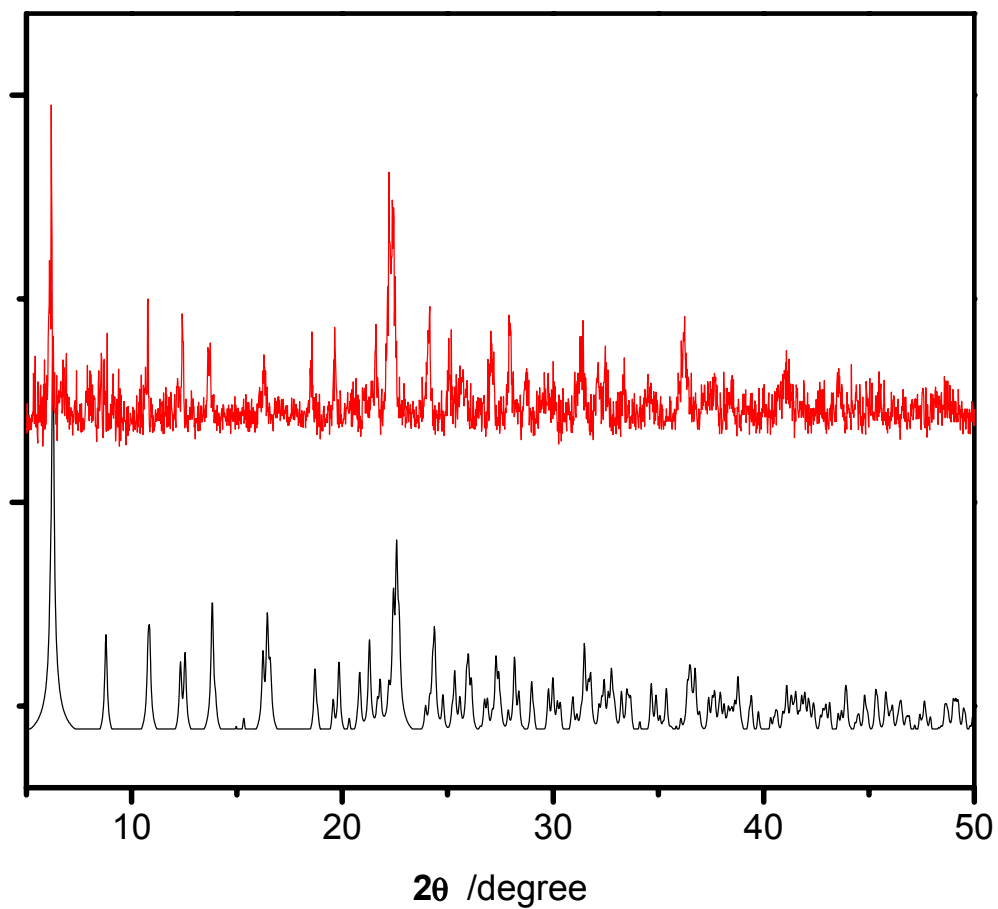

**Figure S4.** XRPD patterns for **2** recorded (red) after removal of the water molecules at 120 °C, and (black) the simulated XRPD pattern calculated from single-crystal data of **2** with Mercury 1.4.2.

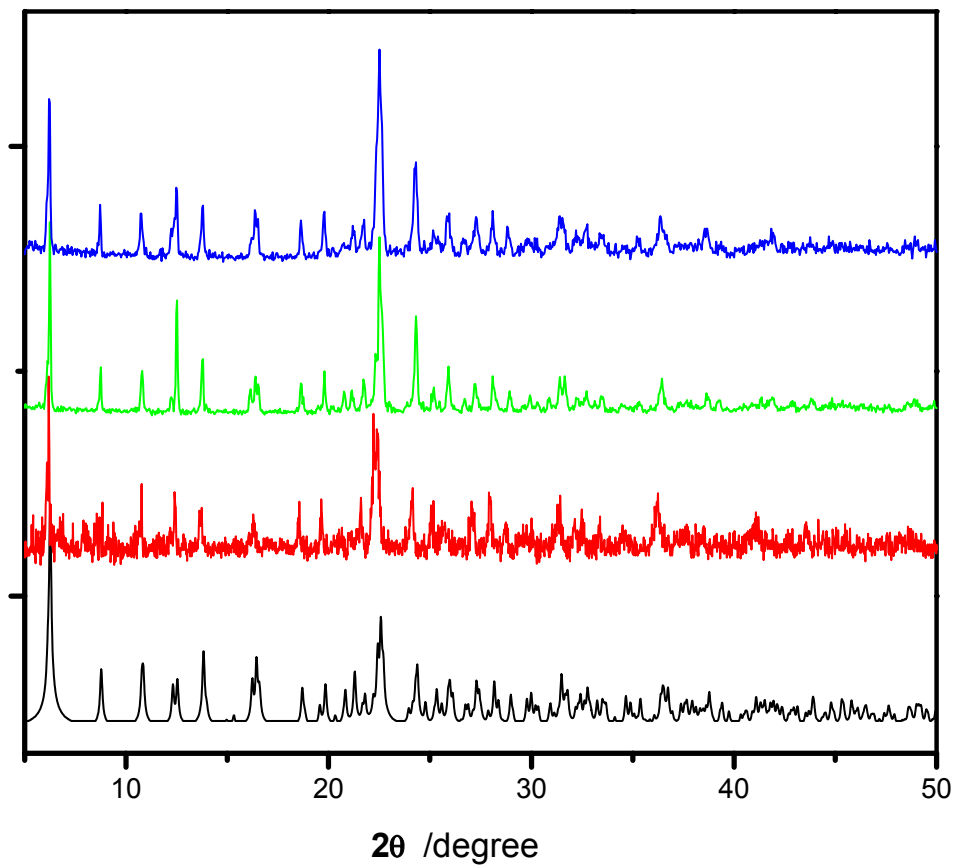

**Figure S5.** XRPD patterns for **2** recorded (red) after removal of the water molecules at 120 °C, (blue) after introduction of the methanol molecules into the desolvated material at room temperature, (green) after removal of the methanol molecules at 120 °C, and (black) the simulated XRPD pattern calculated from single-crystal data of **2** with Mercury 1.4.2.

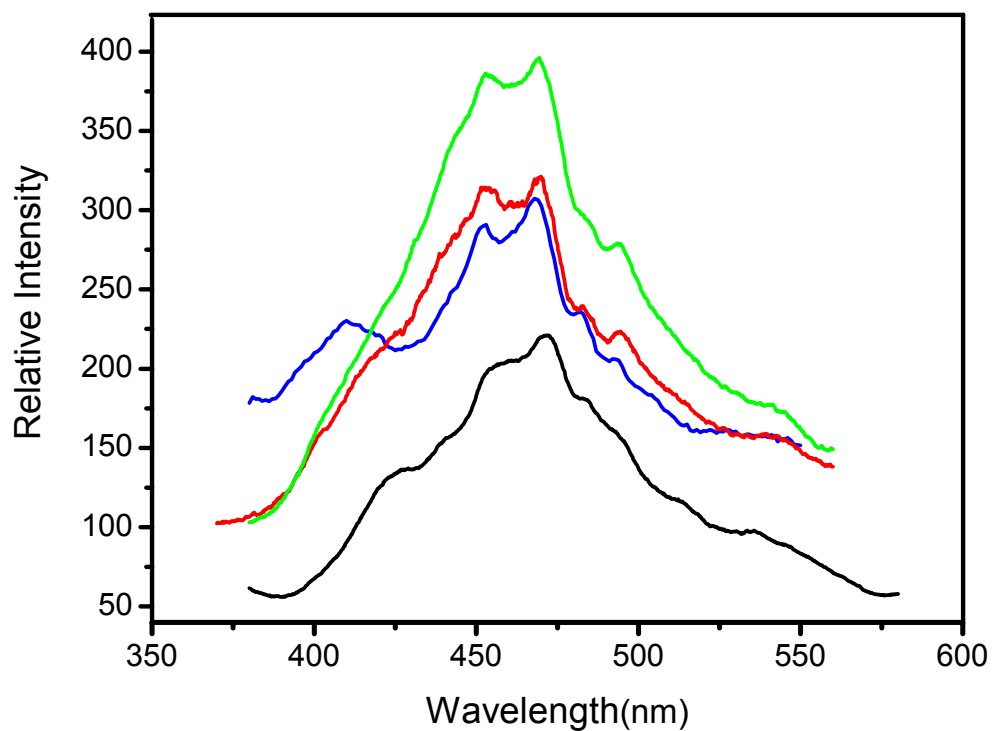

**Figure S6** Solid-state fluorescence emissions recorded at room temperature for H<sub>2</sub>ATIBDC (black), **1** (green), **2** (red), and **3** (blue). The excitation wavelength ( $\lambda_{\text{ex}}$ ) is 290 nm for H<sub>2</sub>ATIBDC and the complexes 1-3.
